# Supplementary material
Source: PubMed Central journal article supplement (PMC1868901)

**A**

Human Beclin-1: RRLKVTGDLF  
 Takifugu rubripes Beclin-1: RRLKVT**S**DLF  
 Oryzias latipes Beclin-1: RRLKVT**S**DLF  
 Danio rerio Beclin-1: RRLKVT**S**NLF

**B**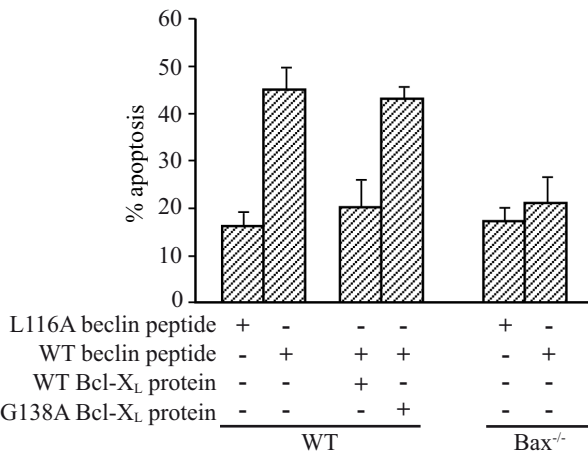**C**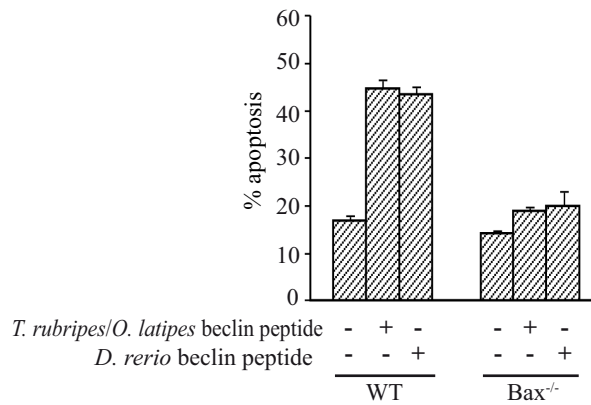**D**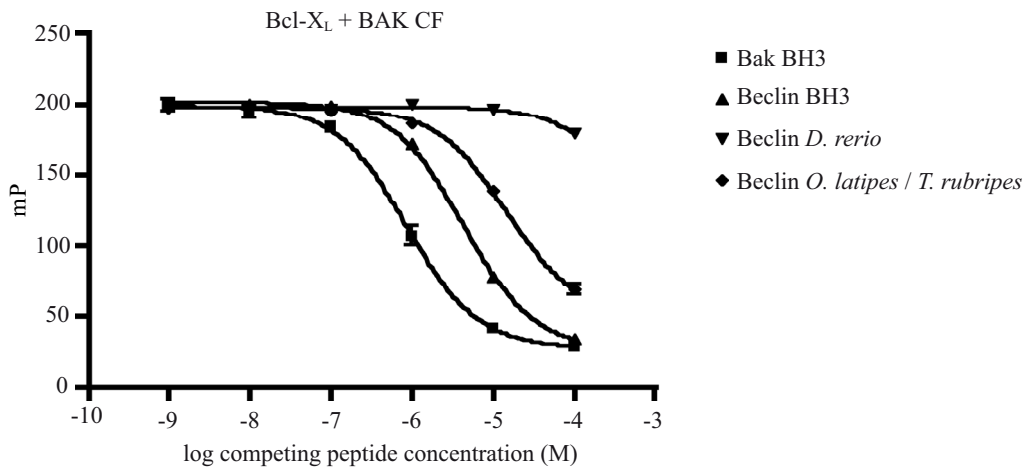**E**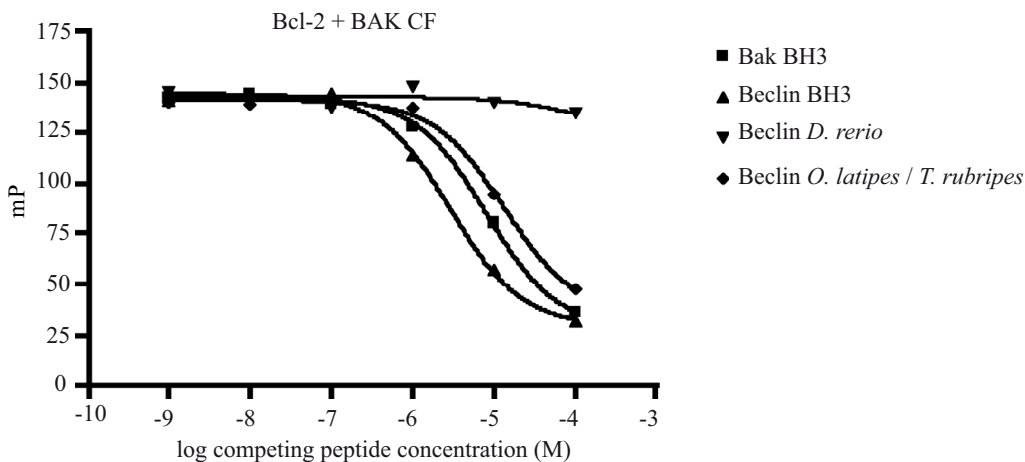

Supplement: 7601689s1.pdf [file 7601689s1.pdf]
