# Supplementary material
Source: PubMed Central journal article supplement (PMC1868901)

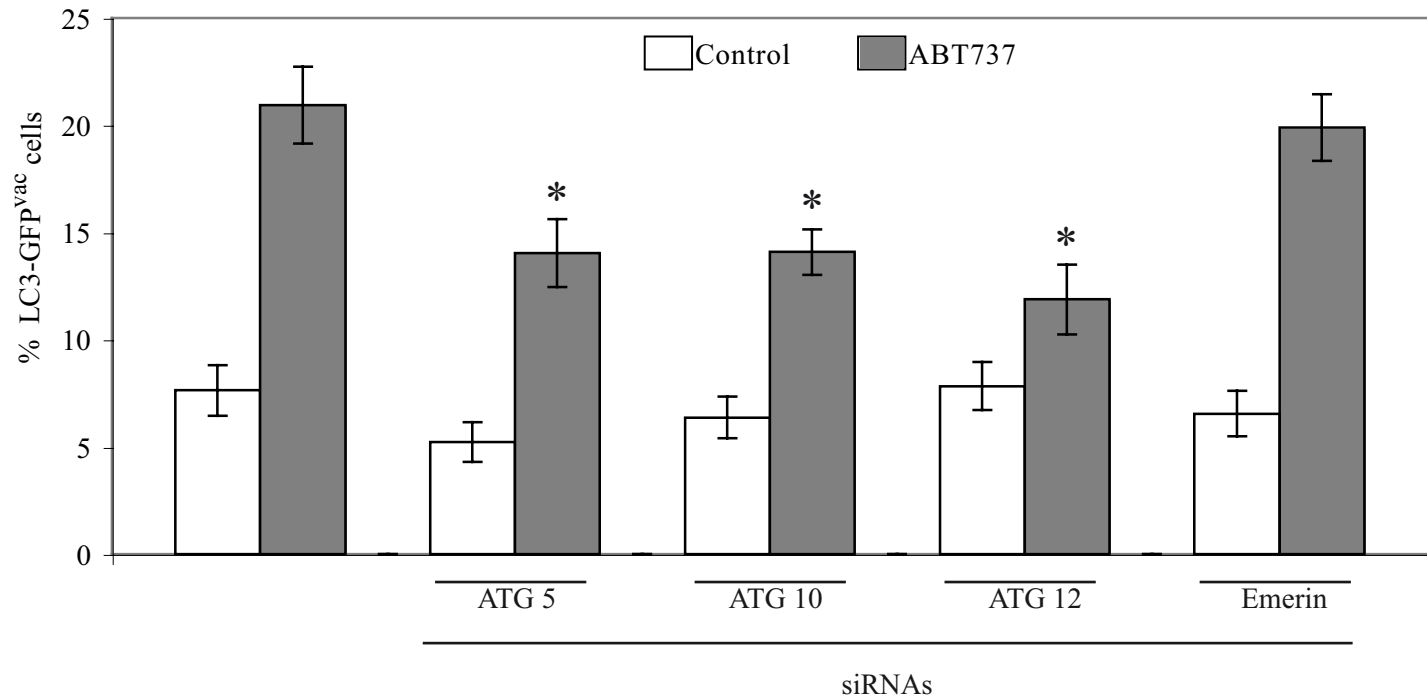

Figure 2S

Supplement: 7601689s2.pdf [file 7601689s2.pdf]

**A**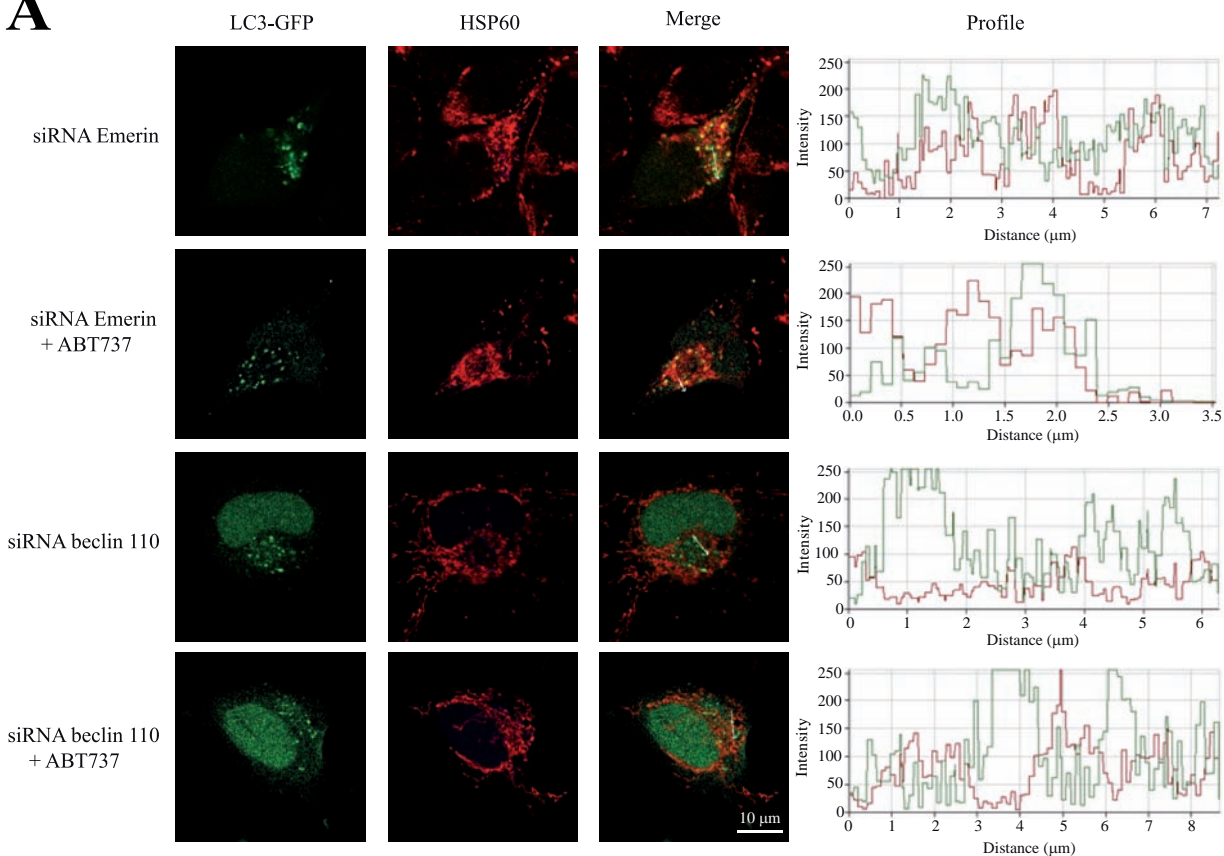**B**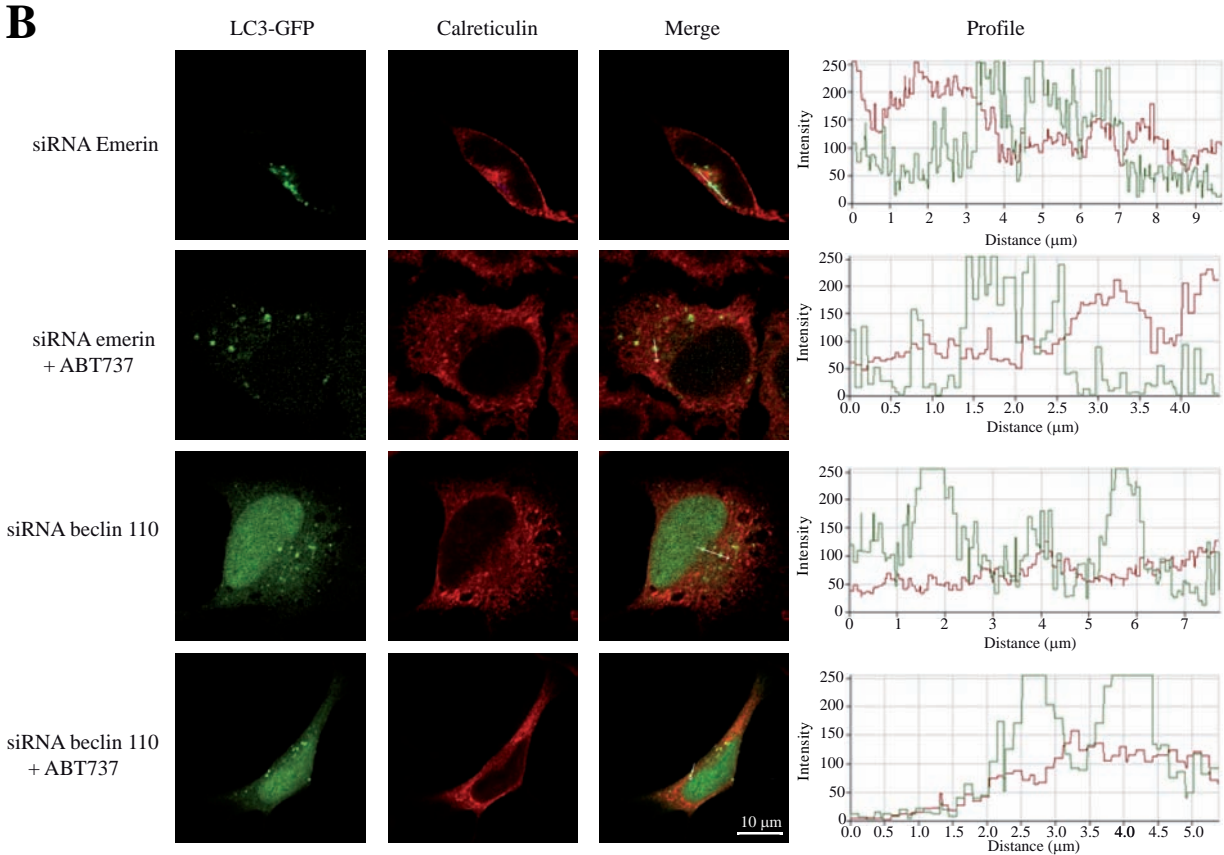**C**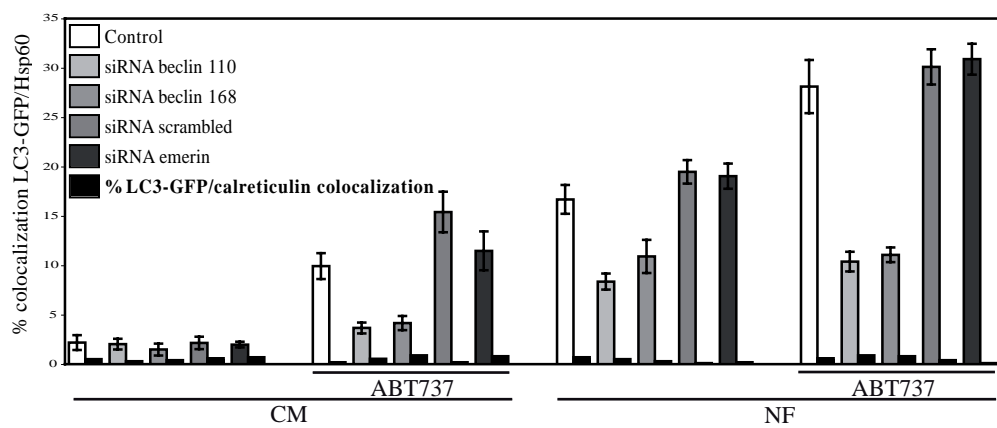

Supplement: 7601689s3.pdf [file 7601689s3.pdf]

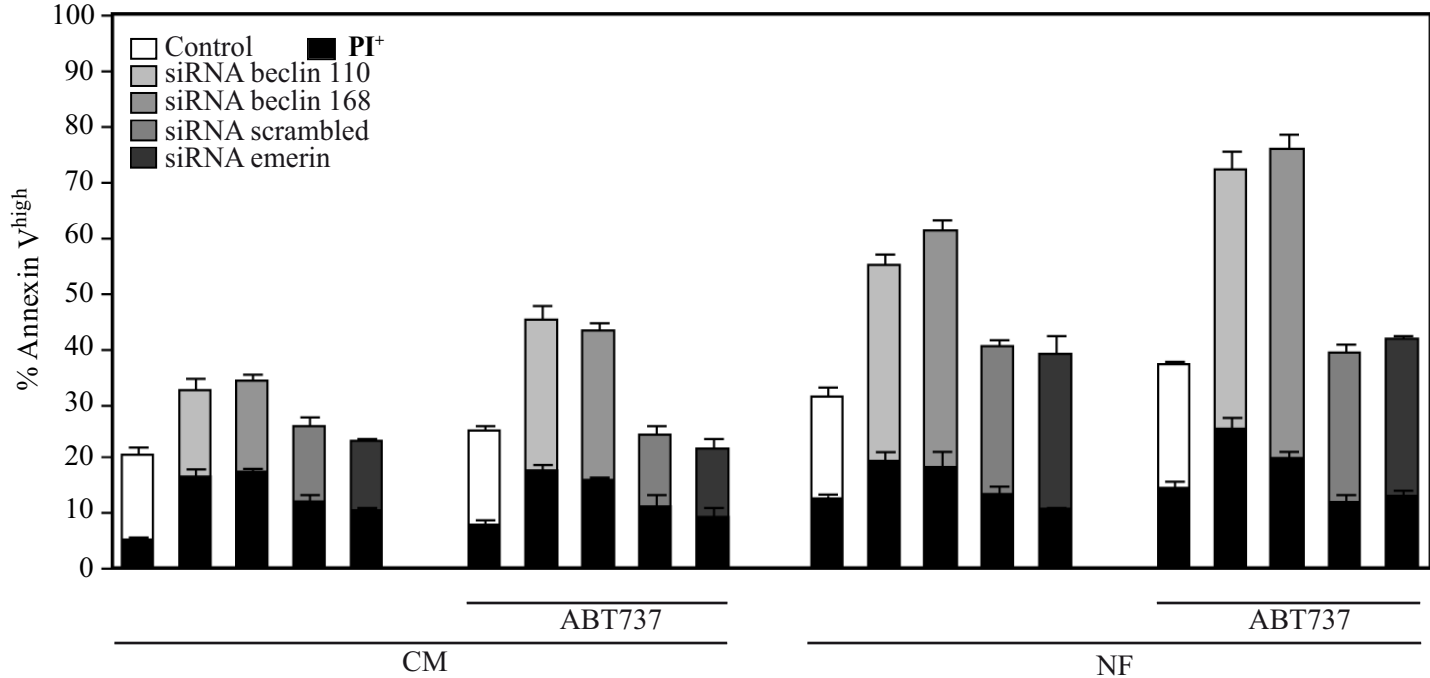

Figure 4S

Supplement: 7601689s4.pdf [file 7601689s4.pdf]
